# Supplementary material for: Downregulation of praja2 restrains endocytosis and boosts tyrosine kinase receptors in kidney cancer
Source: PubMed Central journal article supplement (PMC10879500; doi:10.1038/s42003-024-05823-4), 2024-02-20
Supplement: 42003_2024_5823_MOESM2_ESM.pdf [file 42003_2024_5823_MOESM2_ESM.pdf]

**a**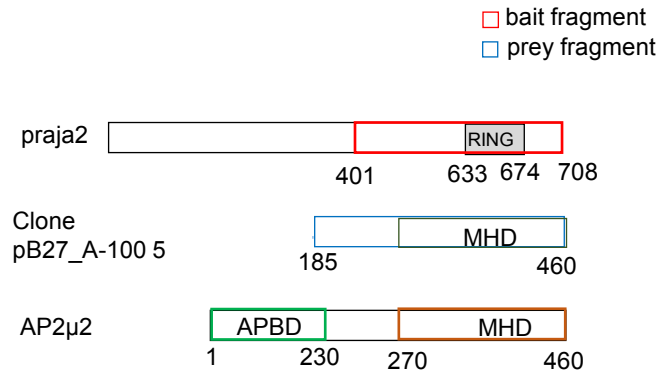**b**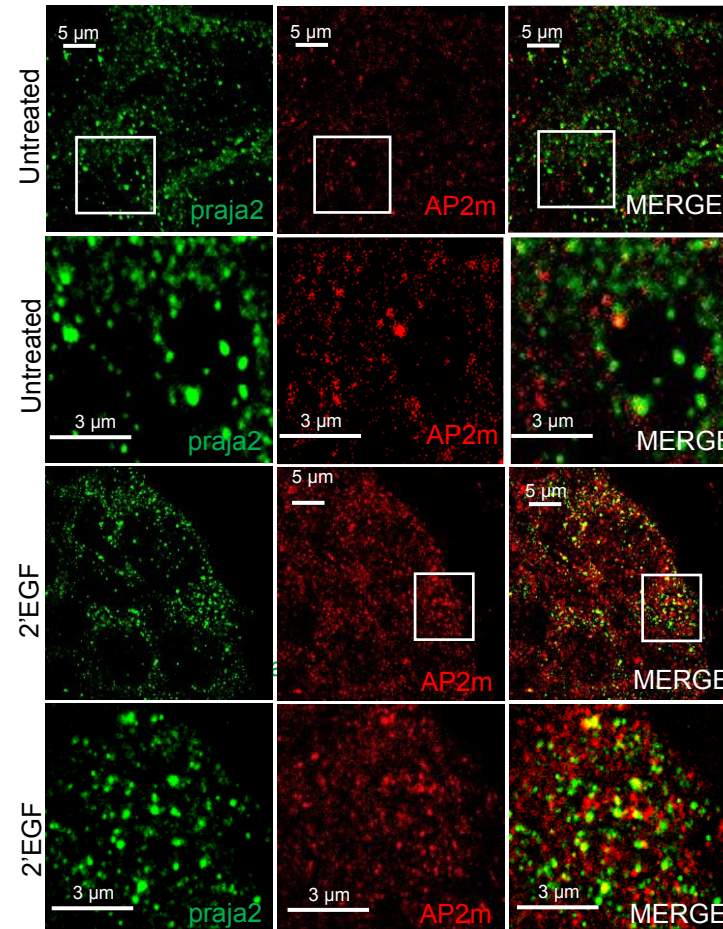**c**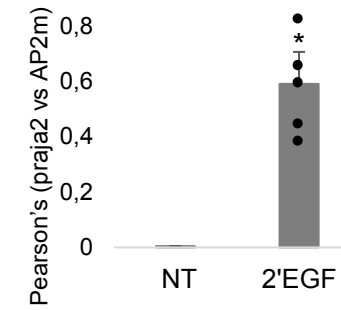

**S1. (a)** Schematic representation of praja2 domains. Highlighted in red is the bait fragment used for the yeast 2-hybrid screening. The prey fragment spanning residues 185-460 of AP-2  $\mu$  subunit is highlighted in blu.

**(b)** HeLa cells, left untreated or treated with EGF, were PFA-fixed and immunostained for praja2 and AP2m.

Representative confocal images are shown. Scale bar (5  $\mu$ M). **(c)** Pearson's coefficient and quantitative analysis of the experiments shown in c. A mean value of three independent experiments  $\pm$  SD is shown. \*P=0,014

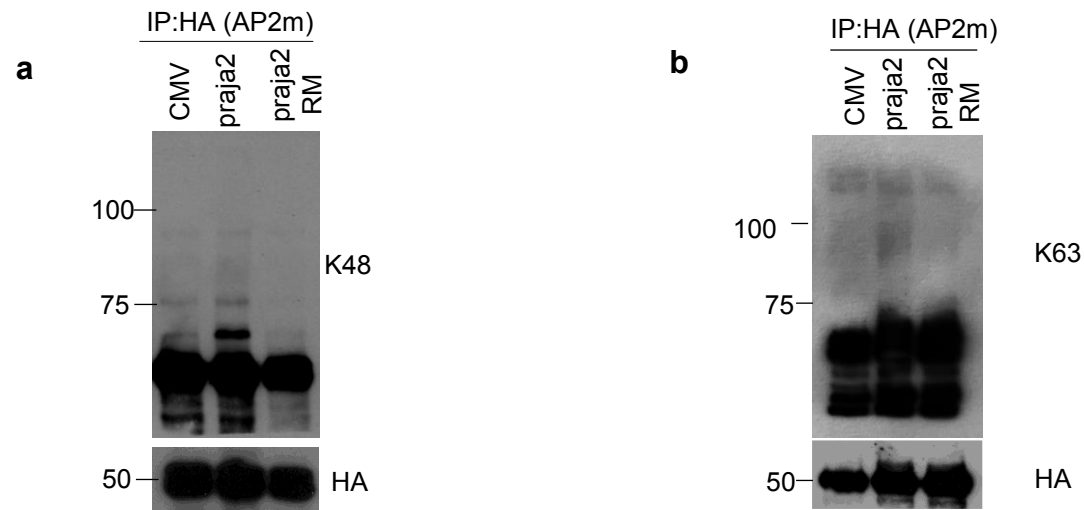

**S2. (a)** Immunoprecipitation of AP2m-HA from HEK293 cell lysates expressing AP2m-HA, Myc-ubiquitin and FLAG-praja2 or FLAG-praja2RM (inactive mutant). Precipitates were immunoblotted with anti-K8 (ubiquitinated AP2m) and anti-HA antibodies. **(b)** Immunoprecipitation of AP2m-HA from HEK293 cell lysates expressing AP2m-HA, Myc-ubiquitin and FLAG-praja2 or FLAG-praja2RM (inactive mutant). Precipitates were immunoblotted with anti-K63 (ubiquitinated AP2m) and anti-HA antibodies.

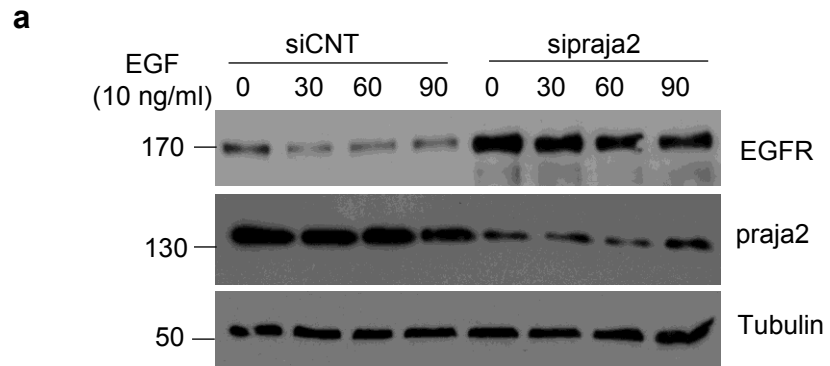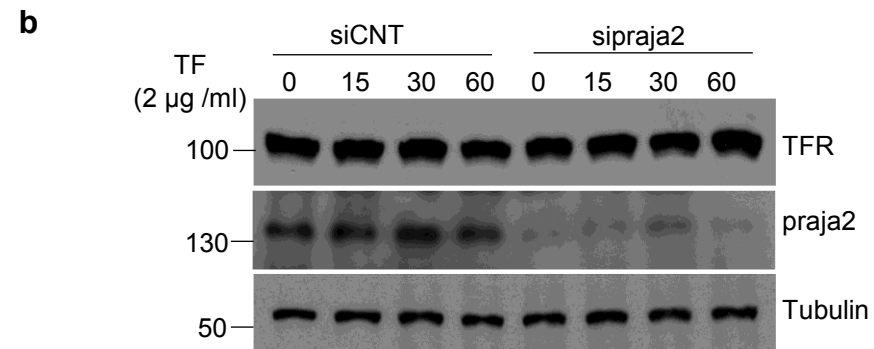

**S3. a.** HK2 cells were transfected with siRNAs (control or targeting praja2), serum-deprived overnight and treated with EGF (10 ng/ml) for indicated times. Lysates were immunoblotted for EGFR and praja2.

**b.** HeLa cells were transfected with siRNAs (control or targeting praja2), serum-deprived overnight and treated with transferrin (Tf, 2 µg/ml) up to 60 minutes. Lysates were immunoblotted for TFR and praja2.

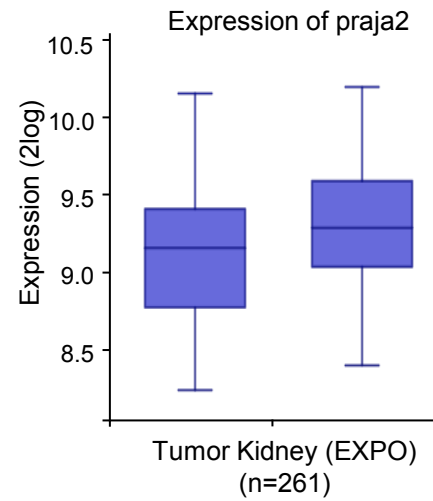

**S4.** Box plot showing relative expression (2log) of praja2 in normal (GSE18674) and tumors kidney tissues (GSE2109). Data were analyzed using “R2: Genomics Analysis and Visualization Platform” and one-way ANOVA test was performed ( $p > 0.01$ ) for statistical analysis.

**a**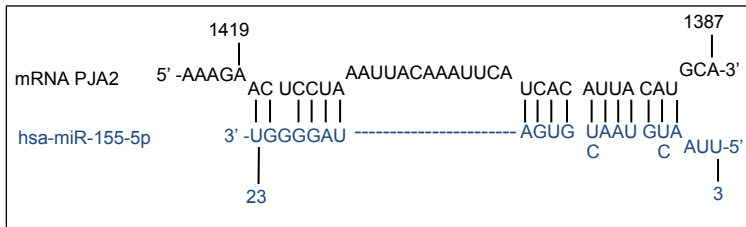**b**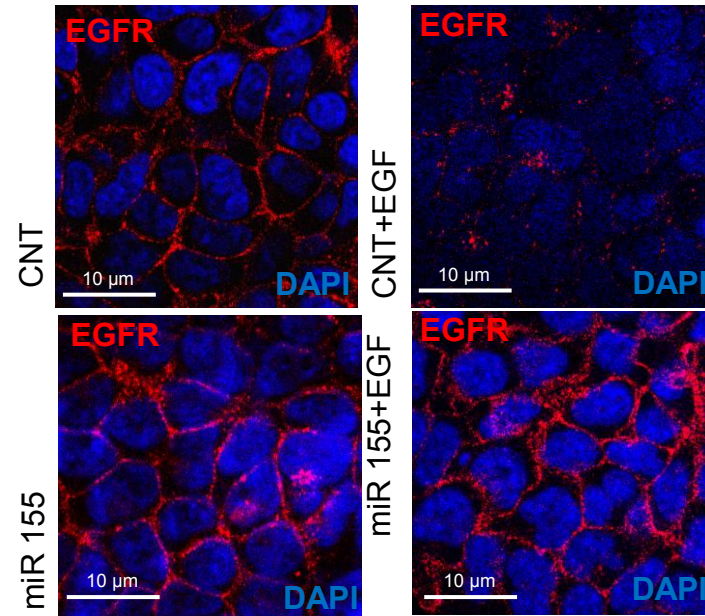

**S5. (a)** Hsa-miR-155-5p was predicted by target prediction programs inTarget to align to positions 1387-1419 on the PJA2 3'UTR. Paired sequence alignment is marked by continuous lines. **(b)** HEK293 cells were transfected with miRNAs (control or 155), serum deprived and treated with EGF (10ng/µl) for 90 minutes. Cells were fixed and immunostained with anti EGFR antibody and DAPI. Representative confocal images are shown

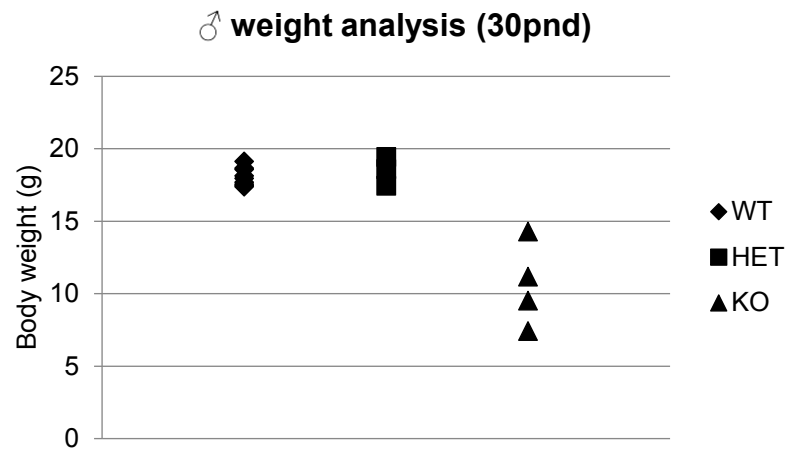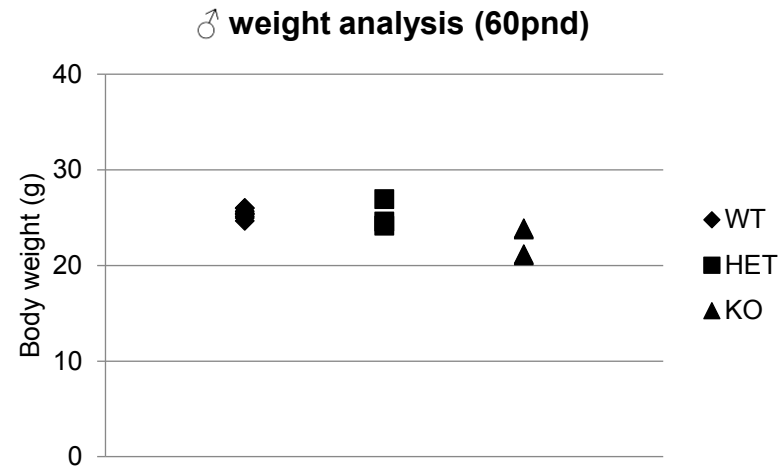

**S6.** Body weight of males Praja2 +/- , Praja2 -/- and control mice at 30 and 60 days after birth (n = 4 for each group)

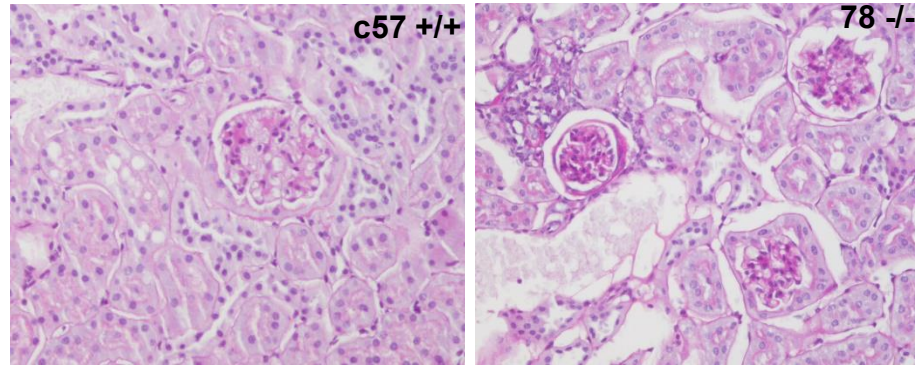

**S7.** Histological examination of kidney, mouse. Mild increase of PAS-positive mesangial matrix. Periodic acid – Schiff, 40x.

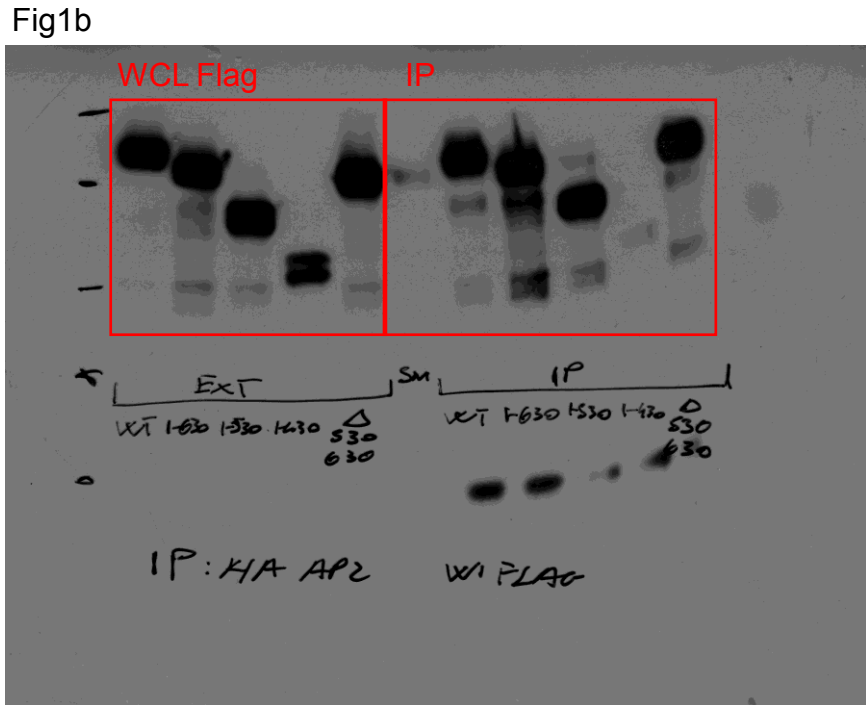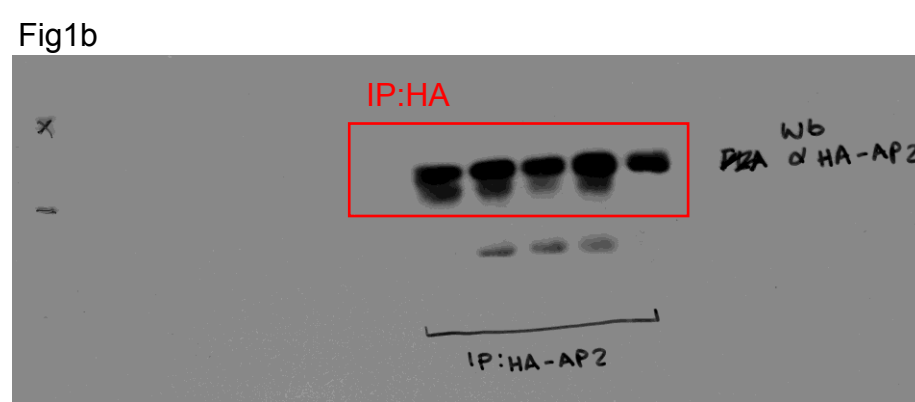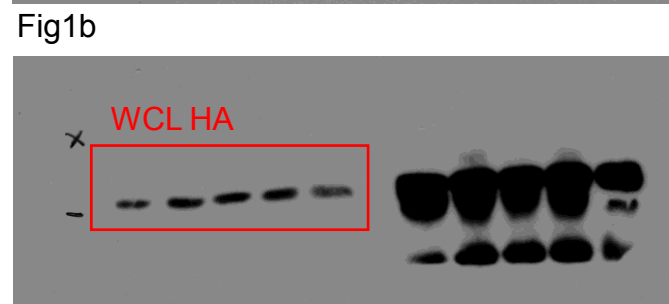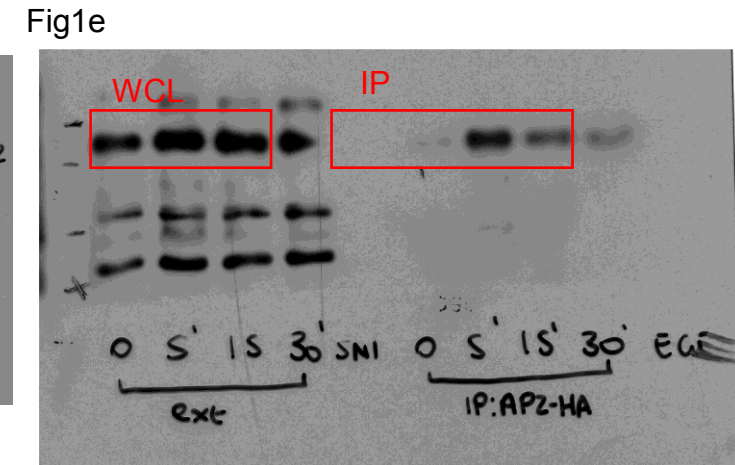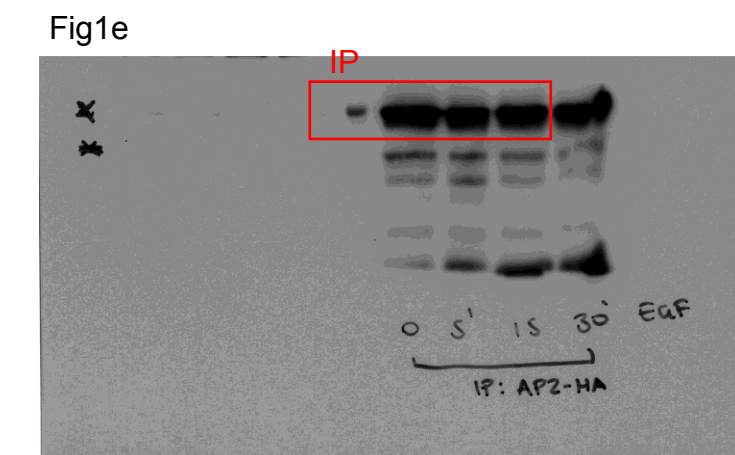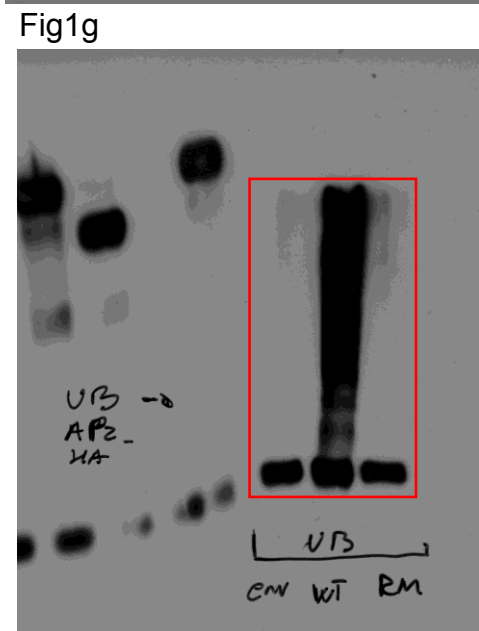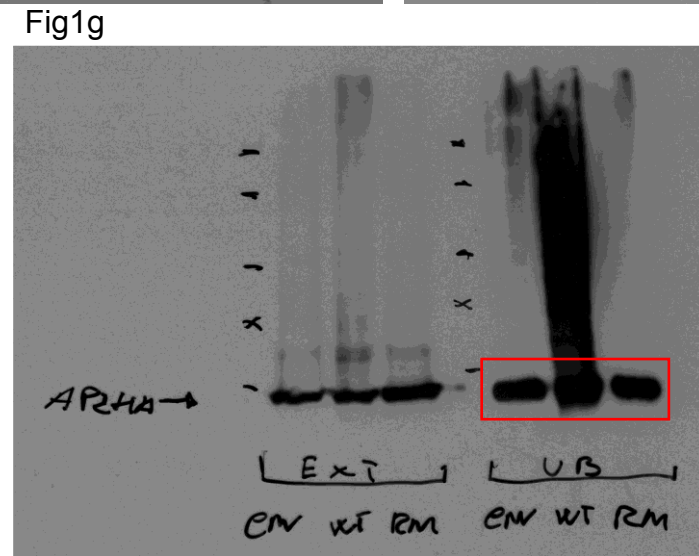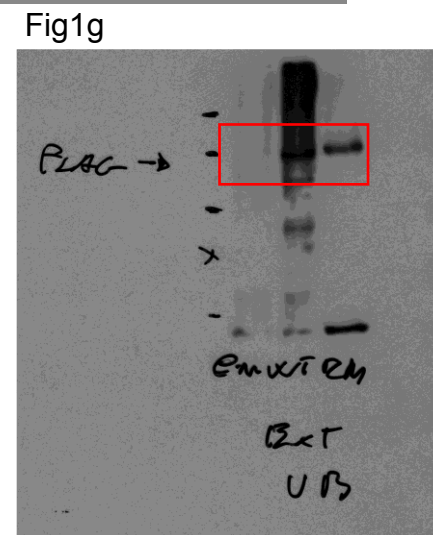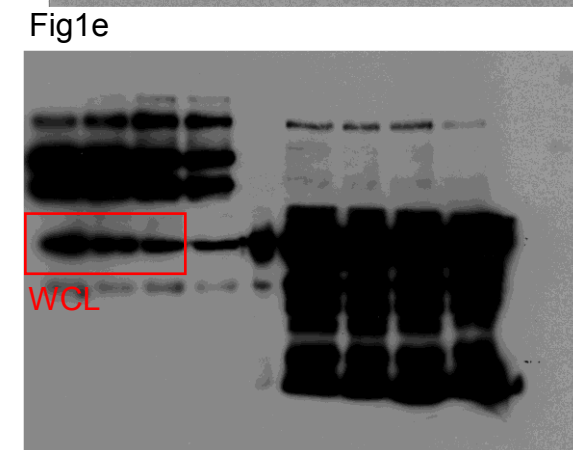



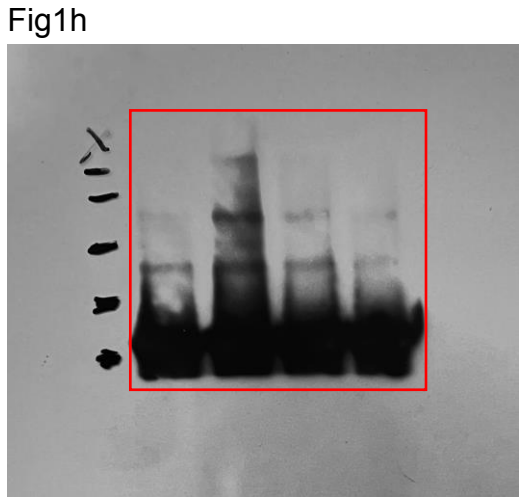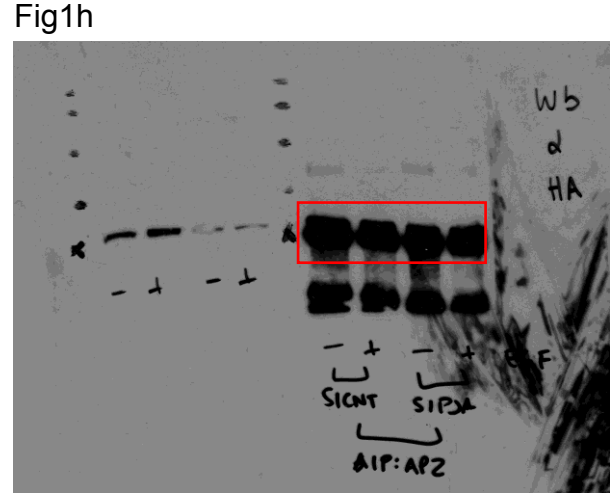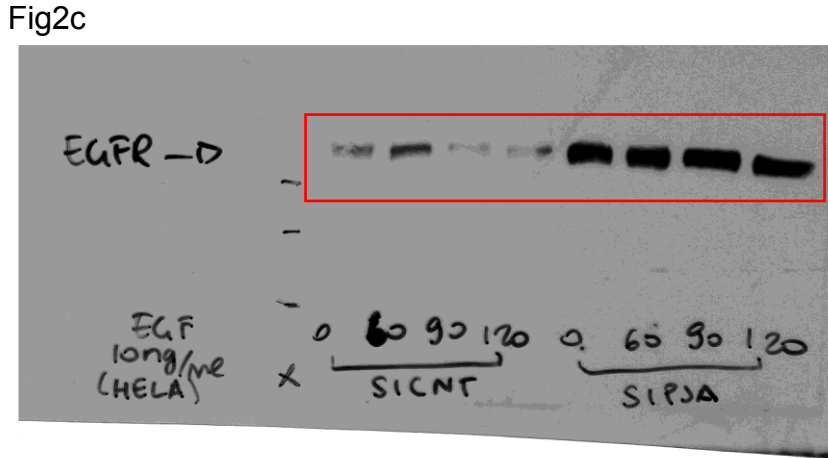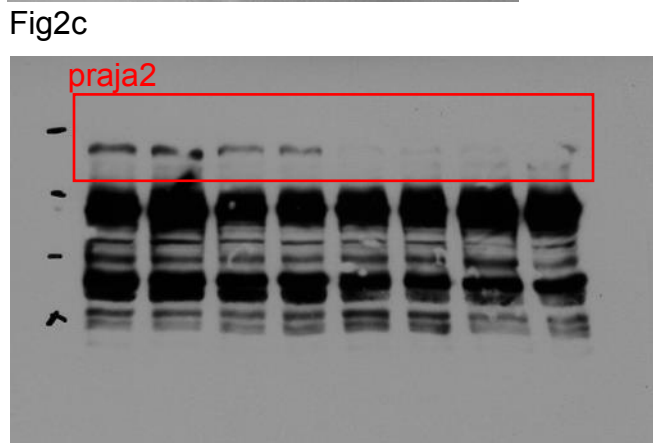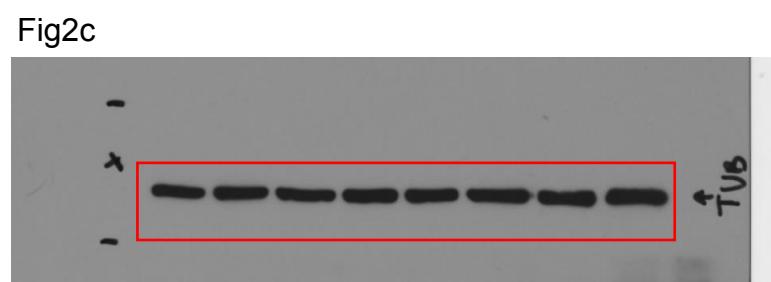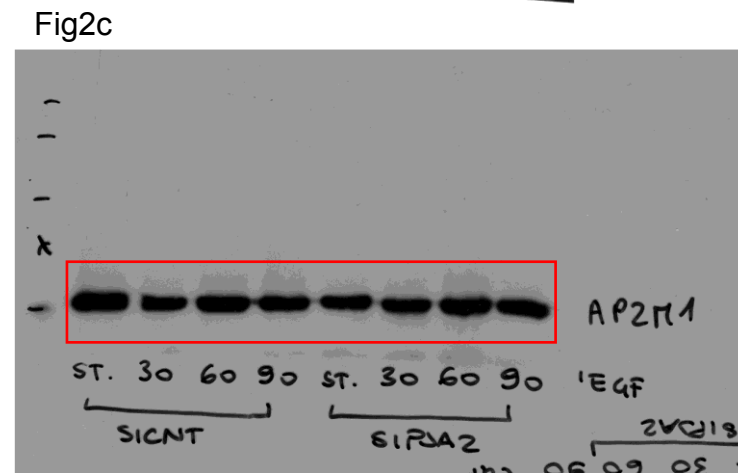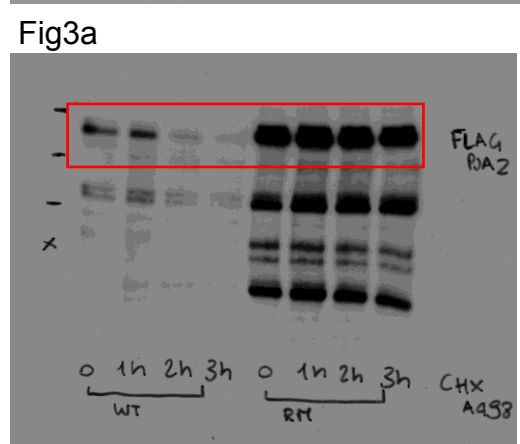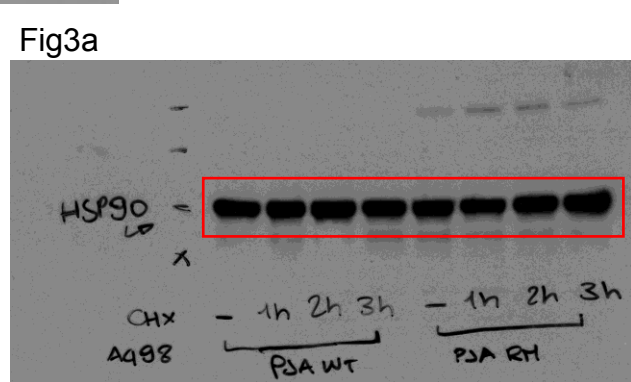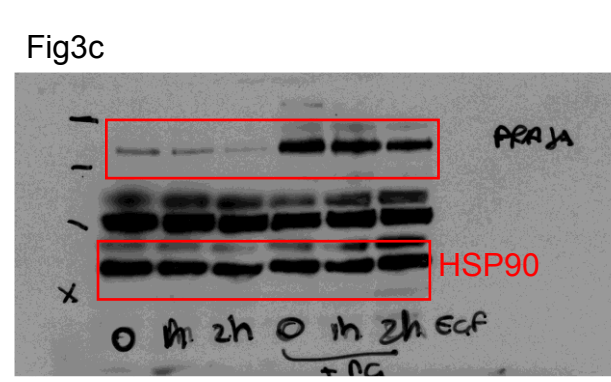

S8. Uncropped gels of the figures presented in Main and Supplementary Figures

Fig3e

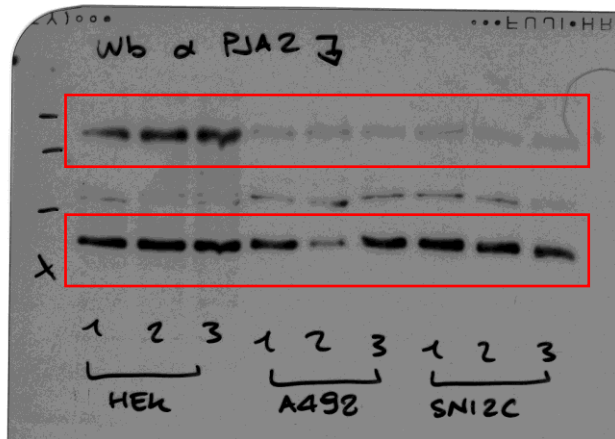

Fig3e

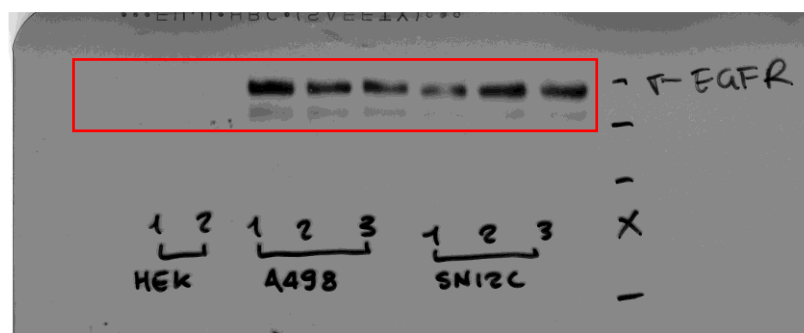

Fig3g

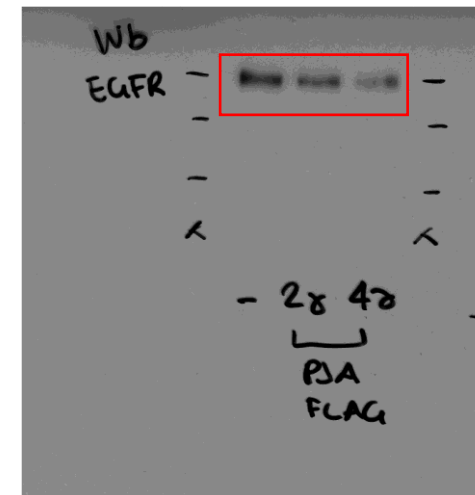

Fig3g

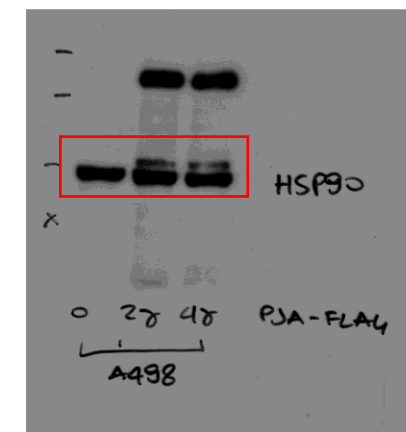

Fig3i

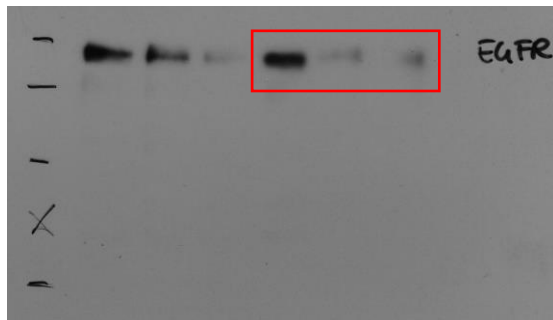

Fig3i

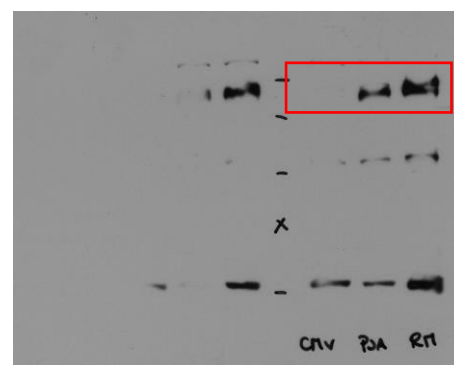

Fig3g

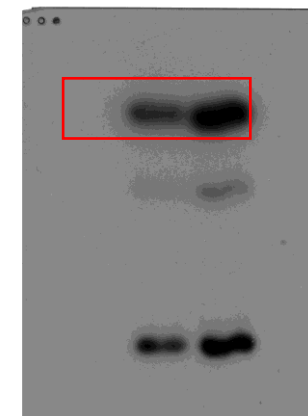

Fig4d

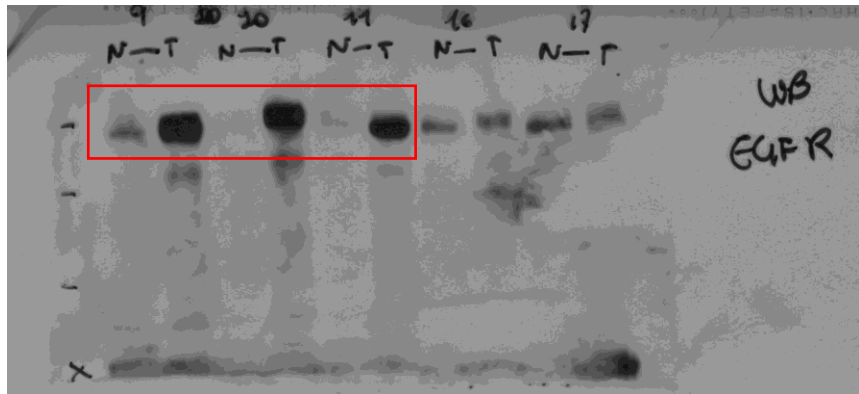

Fig4d

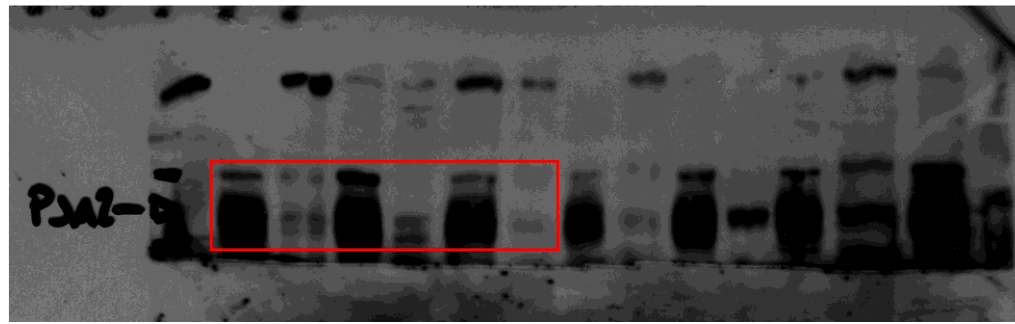

Fig4d

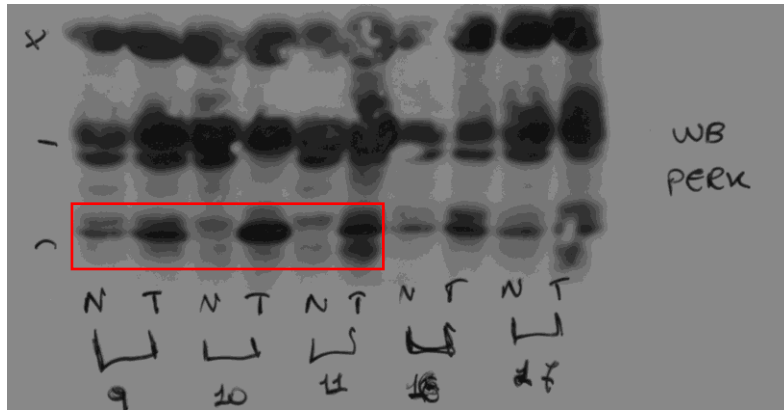

Fig4d

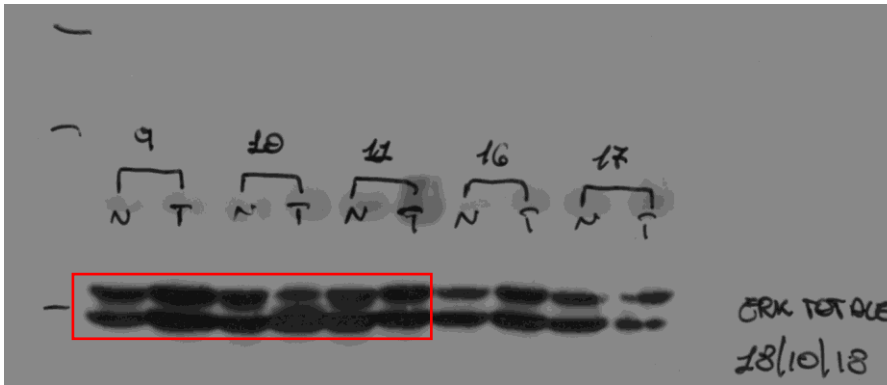

Fig5a

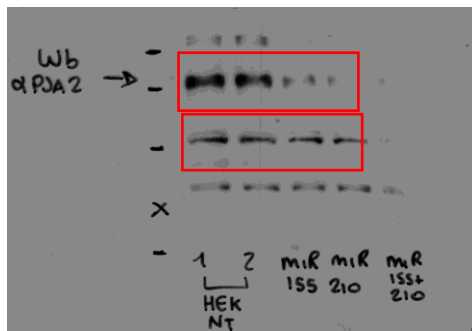

Fig6a

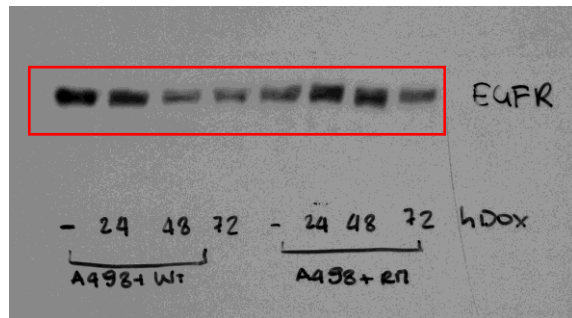

Fig6a

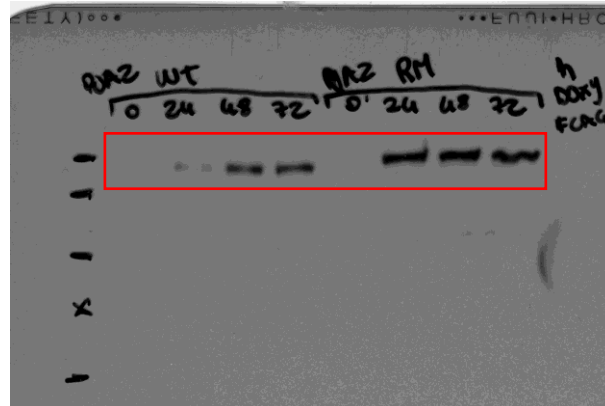

Fig6a

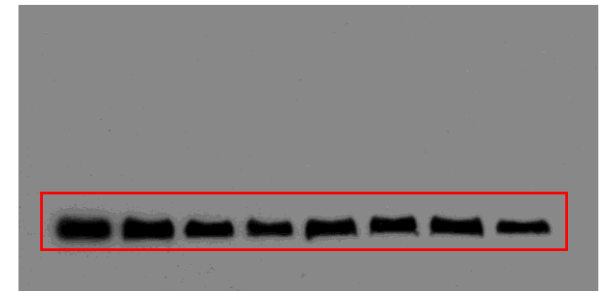

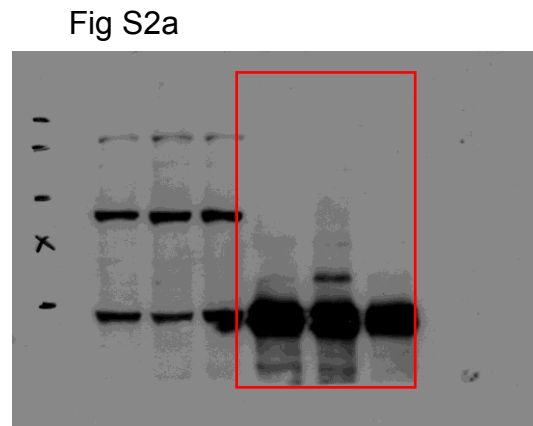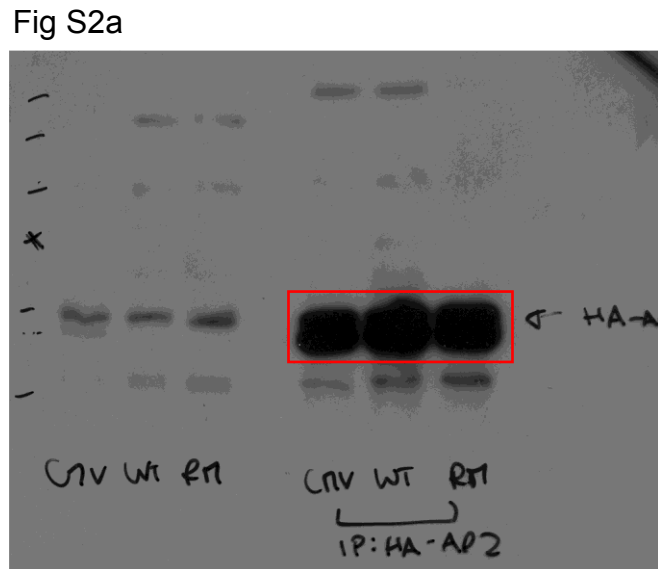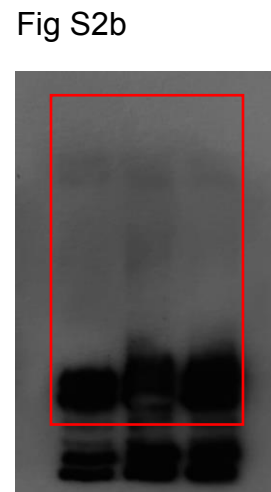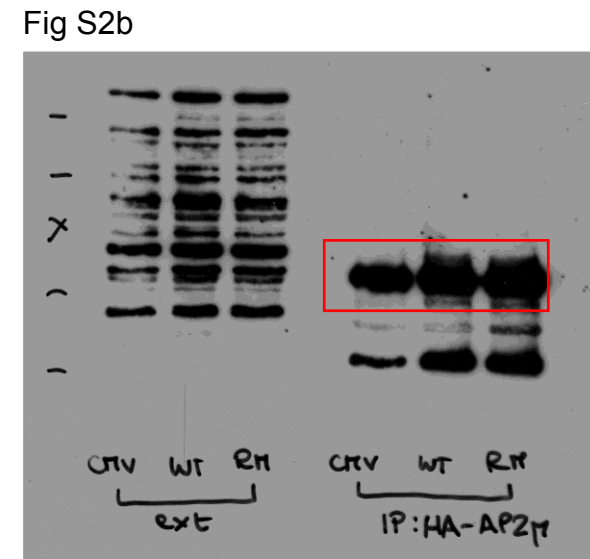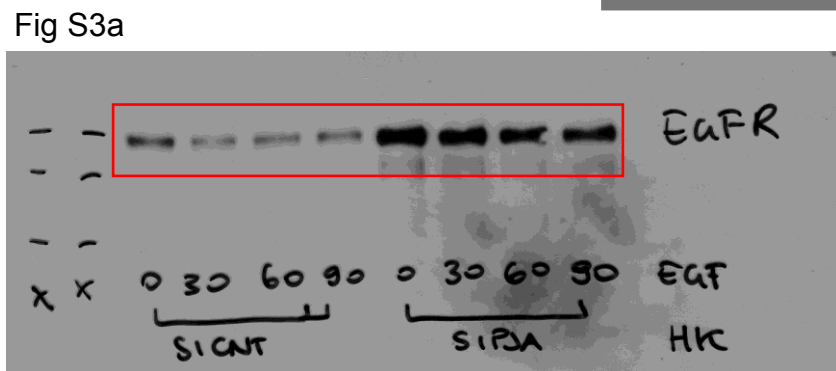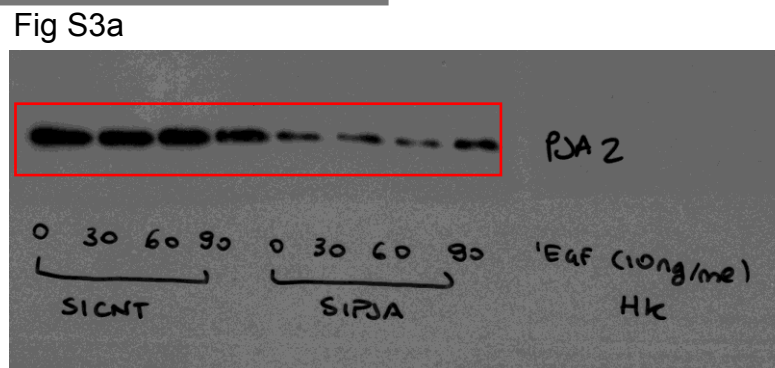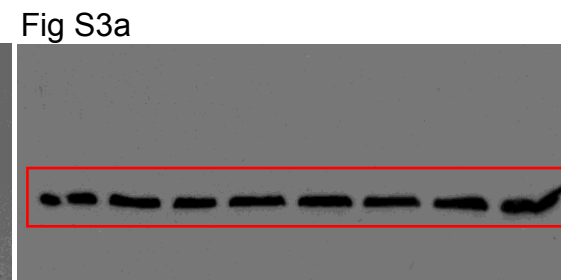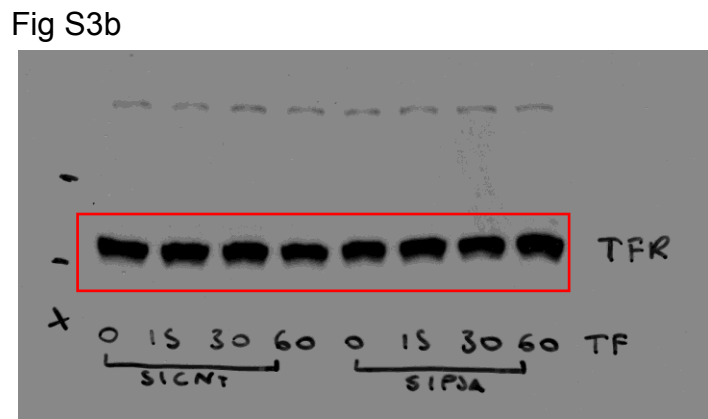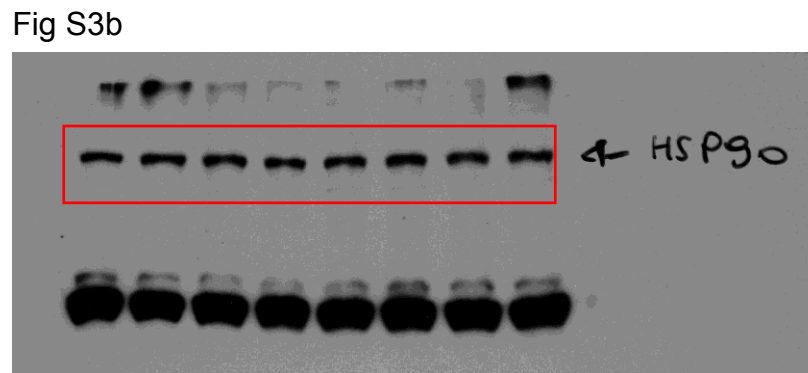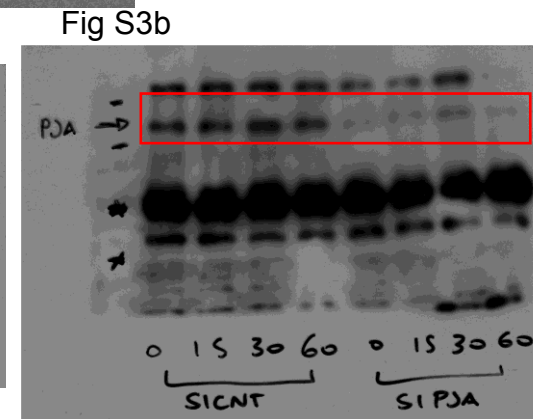

BD FACSDiva 8.0.1

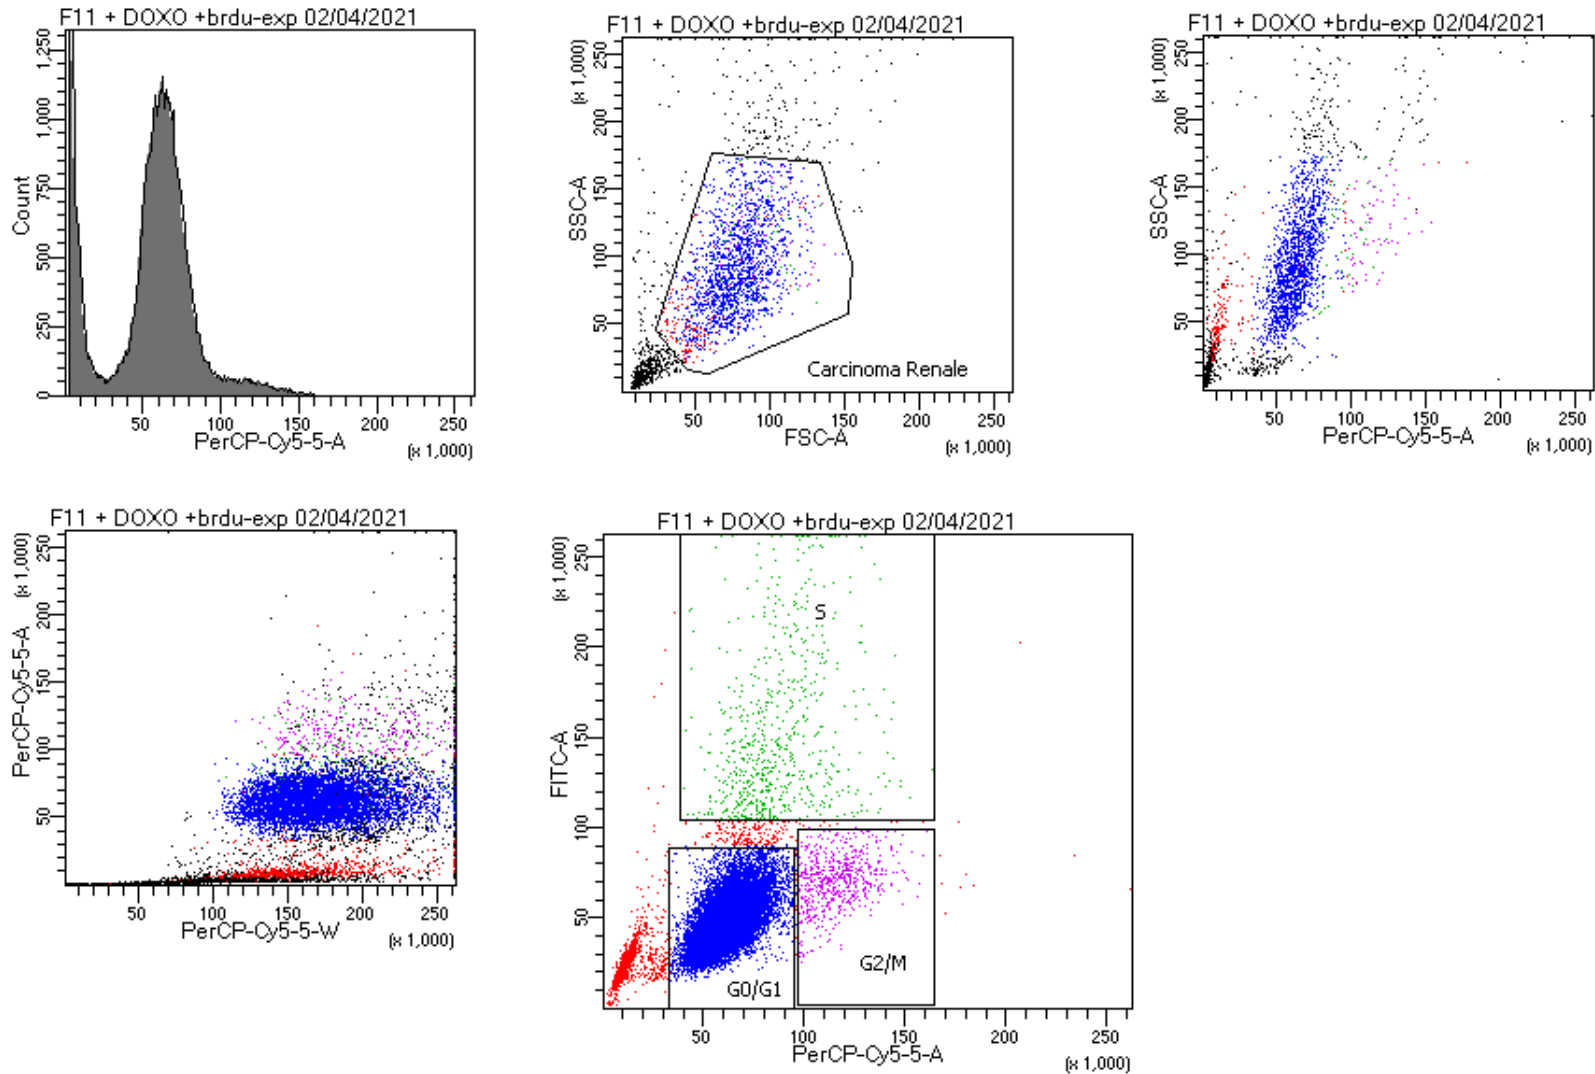

S9. Gating strategy (FACS) data

Supplementary Figure 9

BD FACSDiva 8.0.1

Tube: exp 02/04/2021

| Population       | #Events | %Parent | %Total |
|------------------|---------|---------|--------|
| All Events       | 49,010  | ####    | 100.0  |
| Carcinoma Renale | 34,454  | 70.3    | 70.3   |
| S                | 1,302   | 3.8     | 2.7    |
| G0/G1            | 28,693  | 83.3    | 58.5   |
| G2/M             | 1,159   | 3.4     | 2.4    |

|                  |                               |  |  |  |
|------------------|-------------------------------|--|--|--|
| Experiment Name: | Cloni in Carcinoma Renale ... |  |  |  |
| Specimen Name:   | F11 + DOXO +brdu              |  |  |  |
| Tube Name:       | exp 02/04/2021                |  |  |  |
| Record Date:     | Apr 2, 2021 3:59:52 PM        |  |  |  |
| \$OP:            | Administrator                 |  |  |  |
| GUID:            | 80a139ae-978c-4433-8bc4...    |  |  |  |

  

| Population       | #Events | %Parent | FITC-A PerCP-... |         |
|------------------|---------|---------|------------------|---------|
|                  |         |         | Mean             | Mean    |
| Carcinoma Renale | 34,454  | 70.3    | 52,153           | 60,177  |
| S                | 1,302   | 3.8     | 153,945          | 86,960  |
| G0/G1            | 28,693  | 83.3    | 49,040           | 61,302  |
| G2/M             | 1,159   | 3.4     | 69,652           | 115,011 |

S9. Gating strategy (FACS) data

Supplementary Figure 9

BD FACSDiva 8.0.1

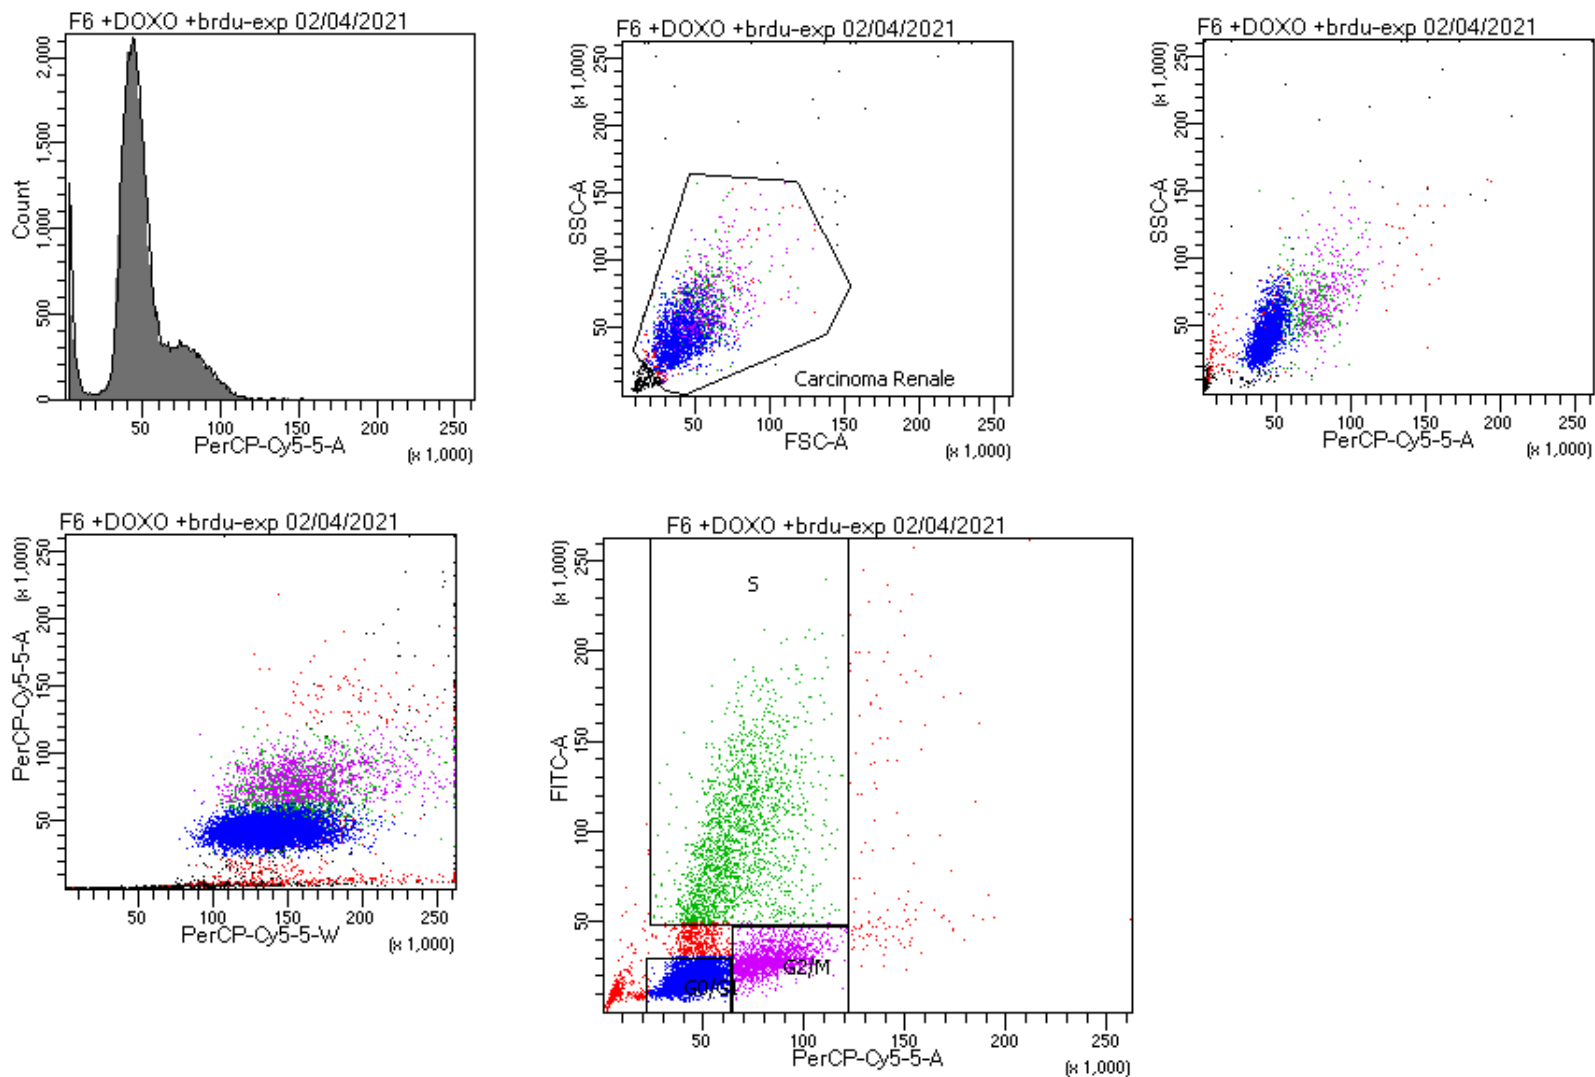

S9. Gating strategy (FACS) data

Supplementary Figure 9

BD FACSDiva 8.0.1

Tube: exp 02/04/2021

| Population         | #Events | %Parent | %Total |
|--------------------|---------|---------|--------|
| ■ All Events       | 55,851  | ####    | 100.0  |
| ■ Carcinoma Renale | 51,617  | 92.4    | 92.4   |
| ■ S                | 7,758   | 15.0    | 13.9   |
| ■ G0/G1            | 33,966  | 65.8    | 60.8   |
| ■ G2/M             | 5,904   | 11.4    | 10.6   |

| Experiment Name:   | Cloni in Carcinoma Renale ... |         |                  |        |
|--------------------|-------------------------------|---------|------------------|--------|
| Specimen Name:     | F6 +DOXO +brdu                |         |                  |        |
| Tube Name:         | exp 02/04/2021                |         |                  |        |
| Record Date:       | Apr 2, 2021 4:12:42 PM        |         |                  |        |
| \$OP:              | Administrator                 |         |                  |        |
| GUID:              | 0faef819-00f4-4b2b-9187-f...  |         |                  |        |
|                    |                               |         | FITC-A PerCP-... |        |
| Population         | #Events                       | %Parent | Mean             | Mean   |
| ■ Carcinoma Renale | 51,617                        | 92.4    | 31,468           | 50,455 |
| ■ S                | 7,758                         | 15.0    | 96,418           | 66,368 |
| ■ G0/G1            | 33,966                        | 65.8    | 16,708           | 42,158 |
| ■ G2/M             | 5,904                         | 11.4    | 28,355           | 81,925 |

S9. Gating strategy (FACS) data

Supplementary Figure 9
