# Supplementary material for: Downregulation of praja2 restrains endocytosis and boosts tyrosine kinase receptors in kidney cancer
Source: PubMed Central journal article supplement (PMC10879500; doi:10.1038/s42003-024-05823-4), 2024-02-20
Supplement: 42003_2024_5823_MOESM3_ESM.pdf [file 42003_2024_5823_MOESM3_ESM.pdf]

## Description of Additional Supplementary Files

File name: Supplementary Data 1

Description: Name of gene products interacting with praja2

File name: Supplementary Data 2

Description: Clinical and histopathological data of patients enrolled in this study.

File name: Supplementary Data 3

Description: All data set obtained in this study
